# Supplementary material for: CAR-neutrophil mediated delivery of tumor-microenvironment responsive nanodrugs for glioblastoma chemo-immunotherapy
Source: PubMed Central journal article supplement (PMC10119091; doi:10.1038/s41467-023-37872-4), 2023-04-20
Supplement: 41467_2023_37872_MOESM3_ESM.pdf [file 41467_2023_37872_MOESM3_ESM.pdf]

## Reporting Summary

Nature Portfolio wishes to improve the reproducibility of the work that we publish. This form provides structure for consistency and transparency in reporting. For further information on Nature Portfolio policies, see our [Editorial Policies](#) and the [Editorial Policy Checklist](#).

### Statistics

For all statistical analyses, confirm that the following items are present in the figure legend, table legend, main text, or Methods section.

n/a Confirmed

- The exact sample size ( $n$ ) for each experimental group/condition, given as a discrete number and unit of measurement
- A statement on whether measurements were taken from distinct samples or whether the same sample was measured repeatedly
- The statistical test(s) used AND whether they are one- or two-sided  
*Only common tests should be described solely by name; describe more complex techniques in the Methods section.*
- A description of all covariates tested
- A description of any assumptions or corrections, such as tests of normality and adjustment for multiple comparisons
- A full description of the statistical parameters including central tendency (e.g. means) or other basic estimates (e.g. regression coefficient) AND variation (e.g. standard deviation) or associated estimates of uncertainty (e.g. confidence intervals)
- For null hypothesis testing, the test statistic (e.g.  $F$ ,  $t$ ,  $r$ ) with confidence intervals, effect sizes, degrees of freedom and  $P$  value noted  
*Give  $P$  values as exact values whenever suitable.*
- For Bayesian analysis, information on the choice of priors and Markov chain Monte Carlo settings
- For hierarchical and complex designs, identification of the appropriate level for tests and full reporting of outcomes
- Estimates of effect sizes (e.g. Cohen's  $d$ , Pearson's  $r$ ), indicating how they were calculated

*Our web collection on [statistics for biologists](#) contains articles on many of the points above.*

### Software and code

Policy information about [availability of computer code](#)

Data collection

Data analysis

For manuscripts utilizing custom algorithms or software that are central to the research but not yet described in published literature, software must be made available to editors and reviewers. We strongly encourage code deposition in a community repository (e.g. GitHub). See the Nature Portfolio [guidelines for submitting code & software](#) for further information.

### Data

Policy information about [availability of data](#)

All manuscripts must include a [data availability statement](#). This statement should provide the following information, where applicable:

- Accession codes, unique identifiers, or web links for publicly available datasets
- A description of any restrictions on data availability
- For clinical datasets or third party data, please ensure that the statement adheres to our [policy](#)

RNA-seq data is accessible via GSE206170: <https://www.ncbi.nlm.nih.gov/geo/query/acc.cgi?acc=GSE206170>. All the data of this study are available within the article, the Supplementary information file, the Source data file, as described in the Reporting summary of this article. Source data are provided with this study.

## Human research participants

Policy information about [studies involving human research participants and Sex and Gender in Research](#).

|                             |                |
|-----------------------------|----------------|
| Reporting on sex and gender | not applicable |
| Population characteristics  | not applicable |
| Recruitment                 | not applicable |
| Ethics oversight            | not applicable |

Note that full information on the approval of the study protocol must also be provided in the manuscript.

## Field-specific reporting

Please select the one below that is the best fit for your research. If you are not sure, read the appropriate sections before making your selection.

Life sciences  Behavioural & social sciences  Ecological, evolutionary & environmental sciences

For a reference copy of the document with all sections, see [nature.com/documents/nr-reporting-summary-flat.pdf](https://www.nature.com/documents/nr-reporting-summary-flat.pdf)

## Life sciences study design

All studies must disclose on these points even when the disclosure is negative.

|                 |                                                                                                                                                                                                                                                                                                                                                                                                                                                                                                                                                                                                                                                        |
|-----------------|--------------------------------------------------------------------------------------------------------------------------------------------------------------------------------------------------------------------------------------------------------------------------------------------------------------------------------------------------------------------------------------------------------------------------------------------------------------------------------------------------------------------------------------------------------------------------------------------------------------------------------------------------------|
| Sample size     | The number of samples for each assay was indicated in each figure legend. For in vitro cellular assays, the sample sizes (at least three biological replicates) were chosen with these assays yielding statistically significant difference between experimental positive and negative controls and on similar sample sizes. Results are representatives of at least three biological replicates. For in vivo assays, at least 5 mice were chosen for each condition, this sample size was determined by using power calculation for a t-test difference between two independent means based on a normally distributed population with equal variance. |
| Data exclusions | No relevant data were excluded. A priori criteria for exclusion were developed.                                                                                                                                                                                                                                                                                                                                                                                                                                                                                                                                                                        |
| Replication     | All experiments were conducted in duplicate or triplicate and reproduced as indicated in the figure legend.                                                                                                                                                                                                                                                                                                                                                                                                                                                                                                                                            |
| Randomization   | For in vivo studies, animals were assigned randomly to experimental and control groups. The rest of the experiments were not randomized, but independent replicates were often performed in different formats and by different investigators, as mitigation measures to cancel out experimental bias. For in vitro studies, samples were also randomly divided into different experimental groups.                                                                                                                                                                                                                                                     |
| Blinding        | Blinding was not possible for any experiment as treatment conditions were evident from the data.                                                                                                                                                                                                                                                                                                                                                                                                                                                                                                                                                       |

## Behavioural & social sciences study design

All studies must disclose on these points even when the disclosure is negative.

|                   |                                                                                                                                                                                                                                                                                                                                                                                                                                                                                 |
|-------------------|---------------------------------------------------------------------------------------------------------------------------------------------------------------------------------------------------------------------------------------------------------------------------------------------------------------------------------------------------------------------------------------------------------------------------------------------------------------------------------|
| Study description | Briefly describe the study type including whether data are quantitative, qualitative, or mixed-methods (e.g. qualitative cross-sectional, quantitative experimental, mixed-methods case study).                                                                                                                                                                                                                                                                                 |
| Research sample   | State the research sample (e.g. Harvard university undergraduates, villagers in rural India) and provide relevant demographic information (e.g. age, sex) and indicate whether the sample is representative. Provide a rationale for the study sample chosen. For studies involving existing datasets, please describe the dataset and source.                                                                                                                                  |
| Sampling strategy | Describe the sampling procedure (e.g. random, snowball, stratified, convenience). Describe the statistical methods that were used to predetermine sample size OR if no sample-size calculation was performed, describe how sample sizes were chosen and provide a rationale for why these sample sizes are sufficient. For qualitative data, please indicate whether data saturation was considered, and what criteria were used to decide that no further sampling was needed. |
| Data collection   | Provide details about the data collection procedure, including the instruments or devices used to record the data (e.g. pen and paper, computer, eye tracker, video or audio equipment) whether anyone was present besides the participant(s) and the researcher, and whether the researcher was blind to experimental condition and/or the study hypothesis during data collection.                                                                                            |
| Timing            | Indicate the start and stop dates of data collection. If there is a gap between collection periods, state the dates for each sample cohort.                                                                                                                                                                                                                                                                                                                                     |

|                   |                                                                                                                                                                                                                         |
|-------------------|-------------------------------------------------------------------------------------------------------------------------------------------------------------------------------------------------------------------------|
| Data exclusions   | <i>If no data were excluded from the analyses, state so OR if data were excluded, provide the exact number of exclusions and the rationale behind them, indicating whether exclusion criteria were pre-established.</i> |
| Non-participation | <i>State how many participants dropped out/declined participation and the reason(s) given OR provide response rate OR state that no participants dropped out/declined participation.</i>                                |
| Randomization     | <i>If participants were not allocated into experimental groups, state so OR describe how participants were allocated to groups, and if allocation was not random, describe how covariates were controlled.</i>          |

## Ecological, evolutionary & environmental sciences study design

All studies must disclose on these points even when the disclosure is negative.

|                                   |                                                                                                                                                                                                                                                                                                                                                                                                                                                               |
|-----------------------------------|---------------------------------------------------------------------------------------------------------------------------------------------------------------------------------------------------------------------------------------------------------------------------------------------------------------------------------------------------------------------------------------------------------------------------------------------------------------|
| Study description                 | <i>Briefly describe the study. For quantitative data include treatment factors and interactions, design structure (e.g. factorial, nested, hierarchical), nature and number of experimental units and replicates.</i>                                                                                                                                                                                                                                         |
| Research sample                   | <i>Describe the research sample (e.g. a group of tagged <i>Passer domesticus</i>, all <i>Stenocereus thurberi</i> within Organ Pipe Cactus National Monument), and provide a rationale for the sample choice. When relevant, describe the organism taxa, source, sex, age range and any manipulations. State what population the sample is meant to represent when applicable. For studies involving existing datasets, describe the data and its source.</i> |
| Sampling strategy                 | <i>Note the sampling procedure. Describe the statistical methods that were used to predetermine sample size OR if no sample-size calculation was performed, describe how sample sizes were chosen and provide a rationale for why these sample sizes are sufficient.</i>                                                                                                                                                                                      |
| Data collection                   | <i>Describe the data collection procedure, including who recorded the data and how.</i>                                                                                                                                                                                                                                                                                                                                                                       |
| Timing and spatial scale          | <i>Indicate the start and stop dates of data collection, noting the frequency and periodicity of sampling and providing a rationale for these choices. If there is a gap between collection periods, state the dates for each sample cohort. Specify the spatial scale from which the data are taken</i>                                                                                                                                                      |
| Data exclusions                   | <i>If no data were excluded from the analyses, state so OR if data were excluded, describe the exclusions and the rationale behind them, indicating whether exclusion criteria were pre-established.</i>                                                                                                                                                                                                                                                      |
| Reproducibility                   | <i>Describe the measures taken to verify the reproducibility of experimental findings. For each experiment, note whether any attempts to repeat the experiment failed OR state that all attempts to repeat the experiment were successful.</i>                                                                                                                                                                                                                |
| Randomization                     | <i>Describe how samples/organisms/participants were allocated into groups. If allocation was not random, describe how covariates were controlled. If this is not relevant to your study, explain why.</i>                                                                                                                                                                                                                                                     |
| Blinding                          | <i>Describe the extent of blinding used during data acquisition and analysis. If blinding was not possible, describe why OR explain why blinding was not relevant to your study.</i>                                                                                                                                                                                                                                                                          |
| Did the study involve field work? | <input type="checkbox"/> Yes <input type="checkbox"/> No                                                                                                                                                                                                                                                                                                                                                                                                      |

## Field work, collection and transport

|                        |                                                                                                                                                                                                                                                                                                                                       |
|------------------------|---------------------------------------------------------------------------------------------------------------------------------------------------------------------------------------------------------------------------------------------------------------------------------------------------------------------------------------|
| Field conditions       | <i>Describe the study conditions for field work, providing relevant parameters (e.g. temperature, rainfall).</i>                                                                                                                                                                                                                      |
| Location               | <i>State the location of the sampling or experiment, providing relevant parameters (e.g. latitude and longitude, elevation, water depth).</i>                                                                                                                                                                                         |
| Access & import/export | <i>Describe the efforts you have made to access habitats and to collect and import/export your samples in a responsible manner and in compliance with local, national and international laws, noting any permits that were obtained (give the name of the issuing authority, the date of issue, and any identifying information).</i> |
| Disturbance            | <i>Describe any disturbance caused by the study and how it was minimized.</i>                                                                                                                                                                                                                                                         |

## Reporting for specific materials, systems and methods

We require information from authors about some types of materials, experimental systems and methods used in many studies. Here, indicate whether each material, system or method listed is relevant to your study. If you are not sure if a list item applies to your research, read the appropriate section before selecting a response.

## Materials &amp; experimental systems

|     |                                     |                                     |                               |
|-----|-------------------------------------|-------------------------------------|-------------------------------|
| n/a | <input type="checkbox"/>            | <input checked="" type="checkbox"/> | Included in the study         |
|     | <input type="checkbox"/>            | <input checked="" type="checkbox"/> | Antibodies                    |
|     | <input type="checkbox"/>            | <input checked="" type="checkbox"/> | Eukaryotic cell lines         |
|     | <input checked="" type="checkbox"/> | <input type="checkbox"/>            | Palaeontology and archaeology |
|     | <input type="checkbox"/>            | <input checked="" type="checkbox"/> | Animals and other organisms   |
|     | <input checked="" type="checkbox"/> | <input type="checkbox"/>            | Clinical data                 |
|     | <input checked="" type="checkbox"/> | <input type="checkbox"/>            | Dual use research of concern  |

## Methods

|     |                                     |                                     |                        |
|-----|-------------------------------------|-------------------------------------|------------------------|
| n/a | <input type="checkbox"/>            | <input checked="" type="checkbox"/> | Included in the study  |
|     | <input type="checkbox"/>            | <input checked="" type="checkbox"/> | ChIP-seq               |
|     | <input type="checkbox"/>            | <input checked="" type="checkbox"/> | Flow cytometry         |
|     | <input checked="" type="checkbox"/> | <input type="checkbox"/>            | MRI-based neuroimaging |

## Antibodies

## Antibodies used

| Antibody                                                  | Source             | Cat. Number | Clone      | Lot         | Dilution |  |  |  |
|-----------------------------------------------------------|--------------------|-------------|------------|-------------|----------|--|--|--|
| PE Mouse monoclonal anti human CD45                       | BD Biosciences     | 555483      | HI30       | 1264455     | 1:500    |  |  |  |
| APC Mouse monoclonal anti human CD45                      | BD Biosciences     | 555485      | HI30       | 8338537     | 1:500    |  |  |  |
| FITC Mouse monoclonal anti human CD45                     | Biolegend          | 304006      | HI30       | B233140     | 1:100    |  |  |  |
| FITC Mouse monoclonal anti human CD34                     | Miltenyi Biotec    | 130113178   | AC136      | 5200210484  | 1:50     |  |  |  |
| APC Mouse monoclonal anti human CD34                      | Miltenyi Biotec    | 130113176   | AC136      | 5200809246  | 1:50     |  |  |  |
| APC Goat polyclonal anti human SOX17                      | R&D systems        | IC1924A     | Q9H6I2     | ABCF0320081 | 1:100    |  |  |  |
| Mouse monoclonal anti human VE-cadherin                   | Miltenyi Biotec    | 130100742   | REA199     | 5190508238  | 1:100    |  |  |  |
| Mouse monoclonal anti human CD66b                         | BD Biosciences     | 561650      | G10F5      | 9192740     | 1:100    |  |  |  |
| Mouse monoclonal anti human MPO                           | Invitrogen         | 11129941    | MPO455-8E6 | 2243483     | 1:100    |  |  |  |
| APC Mouse monoclonal anti human CD11b                     | BD Biosciences     | 561015      | ICRF44     | 1243950     | 1:100    |  |  |  |
| FITC Mouse monoclonal anti human CD16                     | BD Biosciences     | 556618      | 3G8        | 8197598     | 1:100    |  |  |  |
| FITC Mouse monoclonal anti human CD18                     | Miltenyi Biotec    | 130120322   | TS1/18     | 5200706915  | 1:100    |  |  |  |
| Alex fluor 488 Mouse monoclonal anti human CD14           | BD Biosciences     | 561706      | M5E2       | 2251866     | 1:100    |  |  |  |
| PE Mouse monoclonal anti human CD15                       | BD Biosciences     | 562371      | W6D3       | B233353     | 1:100    |  |  |  |
| PE Mouse monoclonal anti human CD44                       | BD Biosciences     | 555478      | G44-26     | 0030947     | 1:100    |  |  |  |
| Acti-Stain 488 Phalloidin                                 | Cytoskeleton, Inc. | PHDG1       | n/a        | 037         | 1:100    |  |  |  |
| Mouse monoclonal anti human SSEA-4                        | R&D systems        | MAB1435     | MC-813-70  | JTW5461201  | 1:100    |  |  |  |
| Goat monoclonal anti human OCT3/4                         | R&D systems        | AF1759      | Q01860     | JTW0418102  | 1:100    |  |  |  |
| Goat monoclonal anti ratbit IgG                           | Cell Signaling     | 7074S       | n/a        | 28          | 1:1000   |  |  |  |
| β-Actin (13E5) Rabbit mAb (HRP Conjugate)                 | Cell Signaling     | 5125S       | 13E5       | 6           | 1:1000   |  |  |  |
| FITC Mouse Anti-Human IgG4 pFc'                           | SouthernBiotech    | 9190-02     | HP6023     | L3820-M831C | 1:1000   |  |  |  |
| Rabbit monoclonal anti human p44/42 MAPK (Erk1/2)         | Cell Signaling     | 4695T       | 137F5      | 28          | 1:1000   |  |  |  |
| Rabbit monoclonal anti human Phospho-p44/42 MAPK (Erk1/2) | Cell Signaling     | 4370T       | D13.14.4E  | 28          | 1:1000   |  |  |  |
| Rabbit monoclonal anti human Syk                          | Cell Signaling     | 13198T      | D3Z1E      | 9           | 1:1000   |  |  |  |
| Rabbit monoclonal anti human Phospho-Syk                  | Cell Signaling     | 2710T       | C87C1      | 23          | 1:1000   |  |  |  |

## Validation

Antibodies were validated using positive and negative cells or isotype controls. Validation reports were provided by the antibody manufacturers. Appropriate compensation controls were used for every experiment. The BD Accuri C6 plus was calibrated daily using CS&T beads (BD Biosciences) or manufacturer recommended methods.

The manufacturers's instruction below:

Human CD45 (Biosciences, Cat:555483)

<https://wwwbdbiosciences.com/en-nz/products/reagents/flow-cytometry-reagents/research-reagents/single-color-antibodies-ruo/pe-mouse-anti-human-cd45.561866>

Human CD45 (Biosciences, Cat:555485)

<https://wwwbdbiosciences.com/en-us/products/reagents/flow-cytometry-reagents/research-reagents/single-color-antibodies-ruo/apc-mouse-anti-human-cd45.555485>

Human CD45 (Biolegend, Cat:304006)

<https://www.biolegend.com/fr-ch/products/fitc-anti-human-cd45-antibody-707>

Human CD34 (Miltenyi Biotec, Cat:130113178)

<https://www.miltenyibiotec.com/US-en/products/cd34-antibody-anti-human-ac136.html#fitc:100-tests-in-200-ul>

Human SOX17 (R&D systems, Cat: IC1924A)

[https://www.rndsystems.com/products/human-sox17-apc-conjugated-antibody\\_ic1924a](https://www.rndsystems.com/products/human-sox17-apc-conjugated-antibody_ic1924a)

Human VE-cadherin (Santa Cruz, Cat: sc-9989)

<https://www.scbt.com/p/ve-cadherin-antibody-f-8>

Human CD66b (Biosciences, Cat:561650)

<https://wwwbdbiosciences.com/en-us/search-results?searchKey=561650>

Human MPO (Invitrogen, Cat: 11129941)

<https://www.thermofisher.com/antibody/product/Myeloperoxidase-MPO-Antibody-clone-MPO455-8E6-Monoclonal/11-1299-41>

Human CD11b (Biosciences, Cat:561015)

<https://wwwbdbiosciences.com/en-us/products/reagents/flow-cytometry-reagents/research-reagents/single-color-antibodies-ruo/apc-mouse-anti-human-cd11b.561015>

Human CD16 (Biosciences, Cat:556618)  
<https://www.bdbiosciences.com/en-us/products/reagents/flow-cytometry-reagents/research-reagents/single-color-antibodies-ruo/fitc-mouse-anti-human-cd16.556618>  
 Human CD18 (Miltenyi Biotec, Cat:130120322)  
<https://www.miltenyibiotec.com/US-en/products/cd18-antibody-anti-human-ts1-18.html#biotin:100-tests-in-1-ml>  
 Human CD14 (Biosciences, Cat:561706)  
<https://www.bdbiosciences.com/en-us/products/reagents/flow-cytometry-reagents/research-reagents/single-color-antibodies-ruo/alexa-fluor-488-mouse-anti-human-cd14.561706>  
 Human CD15 (Biosciences, Cat:562371)  
<https://www.bdbiosciences.com/en-us/products/reagents/flow-cytometry-reagents/research-reagents/single-color-antibodies-ruo/pe-mouse-anti-human-cd15.562371>  
 Human CD44 (Biosciences, Cat:555478)  
<https://www.bdbiosciences.com/en-us/products/reagents/flow-cytometry-reagents/research-reagents/single-color-antibodies-ruo/fitc-mouse-anti-human-cd44.555478>  
 Acti-Stain 488 Phalloidin  
<https://www.cytoskeleton.com/actin/acti-stain/phdg1>  
 Human SSEA-4 (Santa Cruz, Cat: sc-21704)  
<https://www.scbt.com/p/ssea-4-antibody-813-70?requestFrom=search>  
 Human OCT3/4 (Santa Cruz, Cat: sc-5279)  
<https://www.scbt.com/p/oct-3-4-antibody-c-10?requestFrom=search>  
 Goat monoclonal anti ratbit IgG (Cell Signaling, Cat: 7074S)  
[https://www.cellsignal.com/products/secondary-antibodies/anti-rabbit-igg-hrp-linked-antibody/7074?\\_=1678990930444&Ntt=7074&tahead=true](https://www.cellsignal.com/products/secondary-antibodies/anti-rabbit-igg-hrp-linked-antibody/7074?_=1678990930444&Ntt=7074&tahead=true)  
 β-Actin (13E5) Rabbit mAb (Cell Signaling, Cat: 5125S)  
[https://www.cellsignal.com/products/antibody-conjugates/b-actin-13e5-rabbit-mab-hrp-conjugate/5125?site-search-type=Products&N=4294956287&Ntt=5125s&fromPage=plp&\\_requestid=582512](https://www.cellsignal.com/products/antibody-conjugates/b-actin-13e5-rabbit-mab-hrp-conjugate/5125?site-search-type=Products&N=4294956287&Ntt=5125s&fromPage=plp&_requestid=582512)  
 Human IgG4 pFc (SouthernBiotech, Cat: 9190-02)  
<https://www.southernbiotech.com/mouse-anti-human-igg4-pfc-fitc-hp6023-9190-02>  
 Human p44/42 MAPK (Erk1/2) (Cell Signaling, Cat: 4695T)  
[https://www.cellsignal.com/products/primary-antibodies/p44-42-mapk-erk1-2-137f5-rabbit-mab/4695?site-search-type=Products&N=4294956287&Ntt=4695t&fromPage=plp&\\_requestid=594955](https://www.cellsignal.com/products/primary-antibodies/p44-42-mapk-erk1-2-137f5-rabbit-mab/4695?site-search-type=Products&N=4294956287&Ntt=4695t&fromPage=plp&_requestid=594955)  
 Human Phospho-p44/42 MAPK (Erk1/2) (Cell Signaling, Cat: 4370T)  
[https://www.cellsignal.com/products/primary-antibodies/phospho-p44-42-mapk-erk1-2-thr202-tyr204-d13-14-4e-xp-rabbit-mab/4370?site-search-type=Products&N=4294956287&Ntt=4370t&fromPage=plp&\\_requestid=595024](https://www.cellsignal.com/products/primary-antibodies/phospho-p44-42-mapk-erk1-2-thr202-tyr204-d13-14-4e-xp-rabbit-mab/4370?site-search-type=Products&N=4294956287&Ntt=4370t&fromPage=plp&_requestid=595024)  
 Human Syk (Cell Signaling, Cat: 13198T)  
[https://www.cellsignal.com/products/primary-antibodies/syk-d3z1e-xp-rabbit-mab/13198?site-search-type=Products&N=4294956287&Ntt=13198t&fromPage=plp&\\_requestid=595190](https://www.cellsignal.com/products/primary-antibodies/syk-d3z1e-xp-rabbit-mab/13198?site-search-type=Products&N=4294956287&Ntt=13198t&fromPage=plp&_requestid=595190)  
 Human Phospho-Syk (Cell Signaling, Cat: 2710T)  
[https://www.cellsignal.com/products/primary-antibodies/phospho-syk-tyr525-526-c87c1-rabbit-mab/2710?site-search-type=Products&N=4294956287&Ntt=2710t&fromPage=plp&\\_requestid=595291](https://www.cellsignal.com/products/primary-antibodies/phospho-syk-tyr525-526-c87c1-rabbit-mab/2710?site-search-type=Products&N=4294956287&Ntt=2710t&fromPage=plp&_requestid=595291)

## Eukaryotic cell lines

Policy information about [cell lines and Sex and Gender in Research](#)

|                                                                   |                                                                                                                                                                                                                                    |
|-------------------------------------------------------------------|------------------------------------------------------------------------------------------------------------------------------------------------------------------------------------------------------------------------------------|
| Cell line source(s)                                               | H9 cells were obtained from WiCell, HBEC-5i cells were obtained from ATCC, and U87MG cells were acquired from Dr. Sandro AT Purdue University.                                                                                     |
| Authentication                                                    | Cell lines were authenticated as by routine practice by WiCell. Cell lines cultured in-house were validated via karyotyping by WiCell services. Morphology and relevant antigen expression was routinely validated during culture. |
| Mycoplasma contamination                                          | Cell lines were tested for the presence of mycoplasma contamination (MycAlert™ Mycoplasma Detection Kit, LT07-318, Lonza, Basel, Switzerland). All the cell line were negative for mycoplasma.                                     |
| Commonly misidentified lines (See <a href="#">ICLAC</a> register) | None of the cell lines used in this manuscript are listed in the ICLAC Database of Cross-contaminated or Misidentified Cell Lines (Version 8.0).                                                                                   |

## Palaeontology and Archaeology

|                     |                                                                                                                                                                                                                                                                                |
|---------------------|--------------------------------------------------------------------------------------------------------------------------------------------------------------------------------------------------------------------------------------------------------------------------------|
| Specimen provenance | <i>Provide provenance information for specimens and describe permits that were obtained for the work (including the name of the issuing authority, the date of issue, and any identifying information). Permits should encompass collection and, where applicable, export.</i> |
| Specimen deposition | <i>Indicate where the specimens have been deposited to permit free access by other researchers.</i>                                                                                                                                                                            |

## Dating methods

*If new dates are provided, describe how they were obtained (e.g. collection, storage, sample pretreatment and measurement), where they were obtained (i.e. lab name), the calibration program and the protocol for quality assurance OR state that no new dates are provided.*

Tick this box to confirm that the raw and calibrated dates are available in the paper or in Supplementary Information.

## Ethics oversight

*Identify the organization(s) that approved or provided guidance on the study protocol, OR state that no ethical approval or guidance was required and explain why not.*

Note that full information on the approval of the study protocol must also be provided in the manuscript.

## Animals and other research organisms

Policy information about [studies involving animals](#); [ARRIVE guidelines](#) recommended for reporting animal research, and [Sex and Gender in Research](#)

## Laboratory animals

Immunodeficient mice: NOD.Cg-RAG1tm1MomL2rgtm1Wjl/SzJ (NRG), all the female mice used in this study were 6- to 10-week-old. Mice were housed in pathogen free and ventilated cages, and allowed free access to auto claved food and water, in a 12 hour light/dark cycle, with room temperature at 21±2 degree and humidity between 45 and 65%.

## Wild animals

This study did not involve wild animals.

## Reporting on sex

Female 6- to 10-week old immunodeficient NOD.Cg-RAG1tm1MomL2rgtm1Wjl/SzJ (NRG) mice were used in this study.

## Field-collected samples

No field-collected samples were used in this study.

## Ethics oversight

All mouse experiments were approved by the Purdue Animal Care and Use Committee (PACUC).

Note that full information on the approval of the study protocol must also be provided in the manuscript.

## Clinical data

Policy information about [clinical studies](#)

All manuscripts should comply with the ICMJE [guidelines for publication of clinical research](#) and a completed [CONSORT checklist](#) must be included with all submissions.

## Clinical trial registration

*Provide the trial registration number from ClinicalTrials.gov or an equivalent agency.*

## Study protocol

*Note where the full trial protocol can be accessed OR if not available, explain why.*

## Data collection

*Describe the settings and locales of data collection, noting the time periods of recruitment and data collection.*

## Outcomes

*Describe how you pre-defined primary and secondary outcome measures and how you assessed these measures.*

## Dual use research of concern

Policy information about [dual use research of concern](#)

### Hazards

Could the accidental, deliberate or reckless misuse of agents or technologies generated in the work, or the application of information presented in the manuscript, pose a threat to:

- | No                       | Yes                      |                            |
|--------------------------|--------------------------|----------------------------|
| <input type="checkbox"/> | <input type="checkbox"/> | Public health              |
| <input type="checkbox"/> | <input type="checkbox"/> | National security          |
| <input type="checkbox"/> | <input type="checkbox"/> | Crops and/or livestock     |
| <input type="checkbox"/> | <input type="checkbox"/> | Ecosystems                 |
| <input type="checkbox"/> | <input type="checkbox"/> | Any other significant area |

## Experiments of concern

Does the work involve any of these experiments of concern:

- | No                       | Yes                      |                                                                             |
|--------------------------|--------------------------|-----------------------------------------------------------------------------|
| <input type="checkbox"/> | <input type="checkbox"/> | Demonstrate how to render a vaccine ineffective                             |
| <input type="checkbox"/> | <input type="checkbox"/> | Confer resistance to therapeutically useful antibiotics or antiviral agents |
| <input type="checkbox"/> | <input type="checkbox"/> | Enhance the virulence of a pathogen or render a nonpathogen virulent        |
| <input type="checkbox"/> | <input type="checkbox"/> | Increase transmissibility of a pathogen                                     |
| <input type="checkbox"/> | <input type="checkbox"/> | Alter the host range of a pathogen                                          |
| <input type="checkbox"/> | <input type="checkbox"/> | Enable evasion of diagnostic/detection modalities                           |
| <input type="checkbox"/> | <input type="checkbox"/> | Enable the weaponization of a biological agent or toxin                     |
| <input type="checkbox"/> | <input type="checkbox"/> | Any other potentially harmful combination of experiments and agents         |

## ChIP-seq

### Data deposition

- Confirm that both raw and final processed data have been deposited in a public database such as [GEO](#).
- Confirm that you have deposited or provided access to graph files (e.g. BED files) for the called peaks.

Data access links

*May remain private before publication.*

<https://www.ncbi.nlm.nih.gov/geo/query/acc.cgi?acc=GSE206170>

Files in database submission

|            |                                 |
|------------|---------------------------------|
| GSM6245281 | U87MG Control1                  |
| GSM6245282 | U87MG Control2                  |
| GSM6245283 | GBM CAR neutrophil_1            |
| GSM6245284 | GBM CAR neutrophil_2            |
| GSM6245285 | GBM Nanodrug_1                  |
| GSM6245286 | GBM Nanodrug_2                  |
| GSM6245287 | GBMXB CAR neutrophil Nanodrug_1 |
| GSM6245288 | GBMXB CAR neutrophil Nanodrug_2 |

Genome browser session  
(e.g. [UCSC](#))

*Provide a link to an anonymized genome browser session for "Initial submission" and "Revised version" documents only, to enable peer review. Write "no longer applicable" for "Final submission" documents.*

### Methodology

Replicates

*Describe the experimental replicates, specifying number, type and replicate agreement.*

Sequencing depth

*Describe the sequencing depth for each experiment, providing the total number of reads, uniquely mapped reads, length of reads and whether they were paired- or single-end.*

Antibodies

*Describe the antibodies used for the ChIP-seq experiments; as applicable, provide supplier name, catalog number, clone name, and lot number.*

Peak calling parameters

*Specify the command line program and parameters used for read mapping and peak calling, including the ChIP, control and index files used.*

Data quality

*Describe the methods used to ensure data quality in full detail, including how many peaks are at FDR 5% and above 5-fold enrichment.*

Software

*Describe the software used to collect and analyze the ChIP-seq data. For custom code that has been deposited into a community repository, provide accession details.*

## Flow Cytometry

### Plots

Confirm that:

- The axis labels state the marker and fluorochrome used (e.g. CD4-FITC).
- The axis scales are clearly visible. Include numbers along axes only for bottom left plot of group (a 'group' is an analysis of identical markers).
- All plots are contour plots with outliers or pseudocolor plots.
- A numerical value for number of cells or percentage (with statistics) is provided.

### Methodology

|                           |                                                                                                                                                                                                                                                                                                                                                                                                                     |
|---------------------------|---------------------------------------------------------------------------------------------------------------------------------------------------------------------------------------------------------------------------------------------------------------------------------------------------------------------------------------------------------------------------------------------------------------------|
| Sample preparation        | Standard flow cytometry protocol was used in this study. Cells were washed before and after staining, and Fc block was used when staining Fc receptor expressing cells. Samples were acquired on an BD Accuri C6 plus. Compensation was performed with every experiment and the instrument was calibrated daily using CS&T beads. Samples preparation details on individual experiments are in the Methods section. |
| Instrument                | Flow cytometry was performed on BD Accuri C6 plus (Becton-Dickinson).                                                                                                                                                                                                                                                                                                                                               |
| Software                  | FCS files were analyzed with FlowJo V10.                                                                                                                                                                                                                                                                                                                                                                            |
| Cell population abundance | The abundance of the cells in total collected samples is around 20%.                                                                                                                                                                                                                                                                                                                                                |
| Gating strategy           | Generally, FACS gating was performed as follows: FSC/SSC→Singlets→Live cells→gating of interest. The appropriate negative control was used for generating gates of interest. Please see Supplementary Figure 1g, Supplementary Figure 4f, and Supplementary Figure 7d for details.                                                                                                                                  |

- Tick this box to confirm that a figure exemplifying the gating strategy is provided in the Supplementary Information.

## Magnetic resonance imaging

### Experimental design

|                                 |                                                                                                                                                                                                                                                                   |
|---------------------------------|-------------------------------------------------------------------------------------------------------------------------------------------------------------------------------------------------------------------------------------------------------------------|
| Design type                     | <i>Indicate task or resting state; event-related or block design.</i>                                                                                                                                                                                             |
| Design specifications           | <i>Specify the number of blocks, trials or experimental units per session and/or subject, and specify the length of each trial or block (if trials are blocked) and interval between trials.</i>                                                                  |
| Behavioral performance measures | <i>State number and/or type of variables recorded (e.g. correct button press, response time) and what statistics were used to establish that the subjects were performing the task as expected (e.g. mean, range, and/or standard deviation across subjects).</i> |

### Acquisition

|                               |                                                                                                                                                                                           |
|-------------------------------|-------------------------------------------------------------------------------------------------------------------------------------------------------------------------------------------|
| Imaging type(s)               | <i>Specify: functional, structural, diffusion, perfusion.</i>                                                                                                                             |
| Field strength                | <i>Specify in Tesla</i>                                                                                                                                                                   |
| Sequence & imaging parameters | <i>Specify the pulse sequence type (gradient echo, spin echo, etc.), imaging type (EPI, spiral, etc.), field of view, matrix size, slice thickness, orientation and TE/TR/flip angle.</i> |
| Area of acquisition           | <i>State whether a whole brain scan was used OR define the area of acquisition, describing how the region was determined.</i>                                                             |
| Diffusion MRI                 | <input type="checkbox"/> Used <input type="checkbox"/> Not used                                                                                                                           |

### Preprocessing

|                        |                                                                                                                                                                                                                                                |
|------------------------|------------------------------------------------------------------------------------------------------------------------------------------------------------------------------------------------------------------------------------------------|
| Preprocessing software | <i>Provide detail on software version and revision number and on specific parameters (model/functions, brain extraction, segmentation, smoothing kernel size, etc.).</i>                                                                       |
| Normalization          | <i>If data were normalized/standardized, describe the approach(es): specify linear or non-linear and define image types used for transformation OR indicate that data were not normalized and explain rationale for lack of normalization.</i> |
| Normalization template | <i>Describe the template used for normalization/transformation, specifying subject space or group standardized space (e.g. original Talairach, MNI305, ICBM152) OR indicate that the data were not normalized.</i>                             |

Noise and artifact removal

Describe your procedure(s) for artifact and structured noise removal, specifying motion parameters, tissue signals and physiological signals (heart rate, respiration).

Volume censoring

Define your software and/or method and criteria for volume censoring, and state the extent of such censoring.

## Statistical modeling & inference

Model type and settings

Specify type (mass univariate, multivariate, RSA, predictive, etc.) and describe essential details of the model at the first and second levels (e.g. fixed, random or mixed effects; drift or auto-correlation).

Effect(s) tested

Define precise effect in terms of the task or stimulus conditions instead of psychological concepts and indicate whether ANOVA or factorial designs were used.

Specify type of analysis:  Whole brain  ROI-based  BothStatistic type for inference  
(See [Eklund et al. 2016](#))

Specify voxel-wise or cluster-wise and report all relevant parameters for cluster-wise methods.

Correction

Describe the type of correction and how it is obtained for multiple comparisons (e.g. FWE, FDR, permutation or Monte Carlo).

## Models & analysis

n/a | Involved in the study

  Functional and/or effective connectivity  Graph analysis  Multivariate modeling or predictive analysis

Functional and/or effective connectivity

Report the measures of dependence used and the model details (e.g. Pearson correlation, partial correlation, mutual information).

Graph analysis

Report the dependent variable and connectivity measure, specifying weighted graph or binarized graph, subject- or group-level, and the global and/or node summaries used (e.g. clustering coefficient, efficiency, etc.).

Multivariate modeling and predictive analysis

Specify independent variables, features extraction and dimension reduction, model, training and evaluation metrics.
